# Supplementary material
Source: PubMed Central journal article supplement (PMC6690705)
Supplement: supp_RA119.007616_143207_2_supp_349341_ptpp1f.pdf [file supp_RA119.007616_143207_2_supp_349341_ptpp1f.pdf]

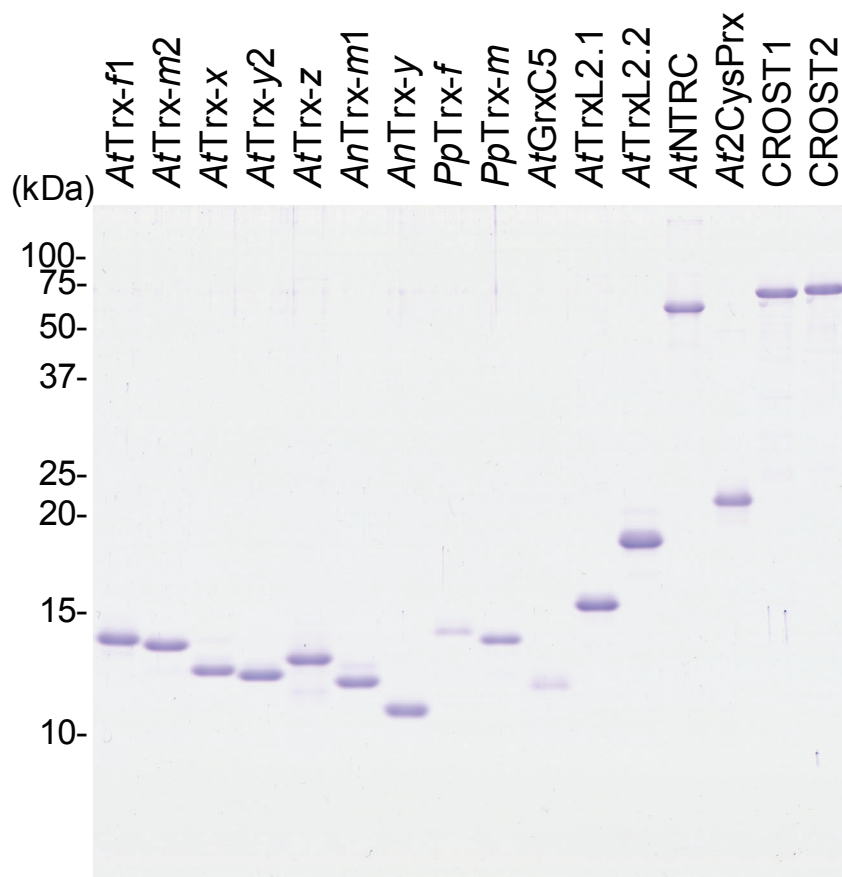

**Figure S1.** Purity of the recombinant proteins. Each of the recombinant proteins (0.5  $\mu$ g) was subjected to SDS-PAGE and was stained with Coomassie Brilliant Blue.
